# Supplementary material
Source: Research Square preprint supplement (doi:10.21203/rs.3.rs-5083630/v1)
Supplement: Supplementary file 1 [file 80cdc9af5caa02ac4be203f2.pdf]

# Supplementary Information

## Near-term future sea level projections supported by extrapolation of tide-gauge observations

Jinping Wang<sup>1,\*</sup>, Xuebin Zhang<sup>2</sup>, John A. Church<sup>3,4</sup>, Matt King<sup>5,6</sup>, and Xianyao Chen<sup>1</sup>

- <sup>1</sup> Frontier Science Center for Deep Ocean Multispheres and Earth System / Key Laboratory of Physical Oceanography, Ocean University of China, Qingdao, China
- <sup>2</sup> Climate Science Centre, CSIRO Environment, Hobart, Australia
- <sup>3</sup> Climate Change Research Centre, University of New South Wales, Sydney, Australia
- <sup>4</sup> The Australian Centre for Excellence in Antarctic Science, University of New South Wales Sydney, Australia
- <sup>5</sup> School of Geography, Planning, and Spatial Sciences, University of Tasmania, Tasmania, Australia
- <sup>6</sup> The Australian Centre for Excellence in Antarctic Science, University of Tasmania, Tasmania, Australia

\* Corresponding author. E-mail: wangjinping@ouc.edu.cn

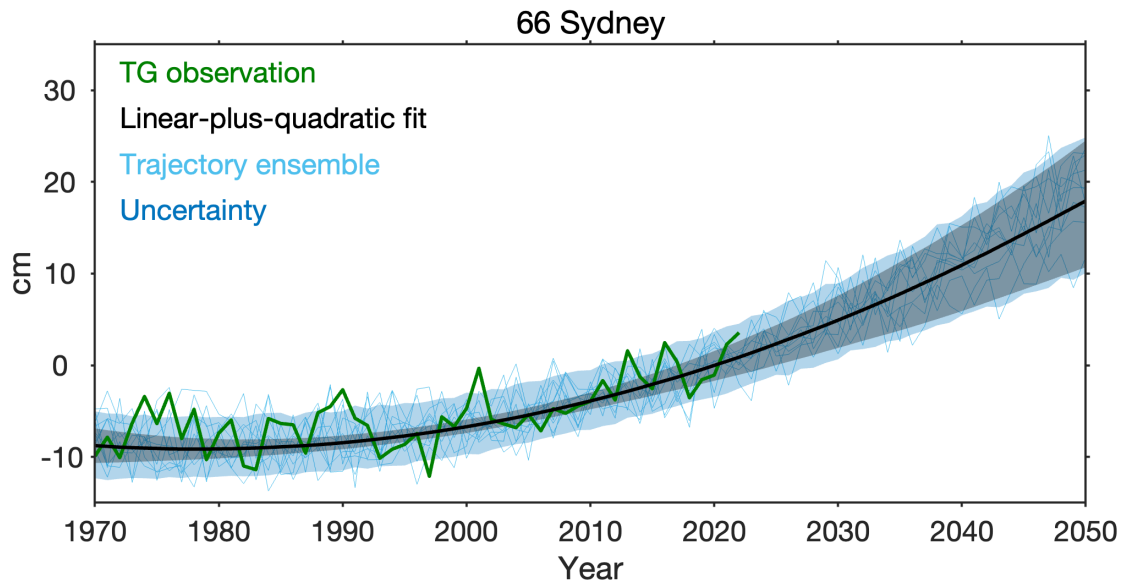

**Supplementary Figure 1. An example of observation-based projection for Sydney.**

The green curve shows annual mean tide gauge observations, while the black curve denotes the estimated observation-based projection. The gray shading denotes the 90% confidence level uncertainty for linear-plus-quadratic fit based on multiple variable linear regression. The blue shading indicates the total uncertainty including considering both the uncertainty due to internal variability on the estimated trend and acceleration, and the uncertainty of unforced sea level variability in the future. The light blue curves show some example ensemble members of the observation-based projection realizations.

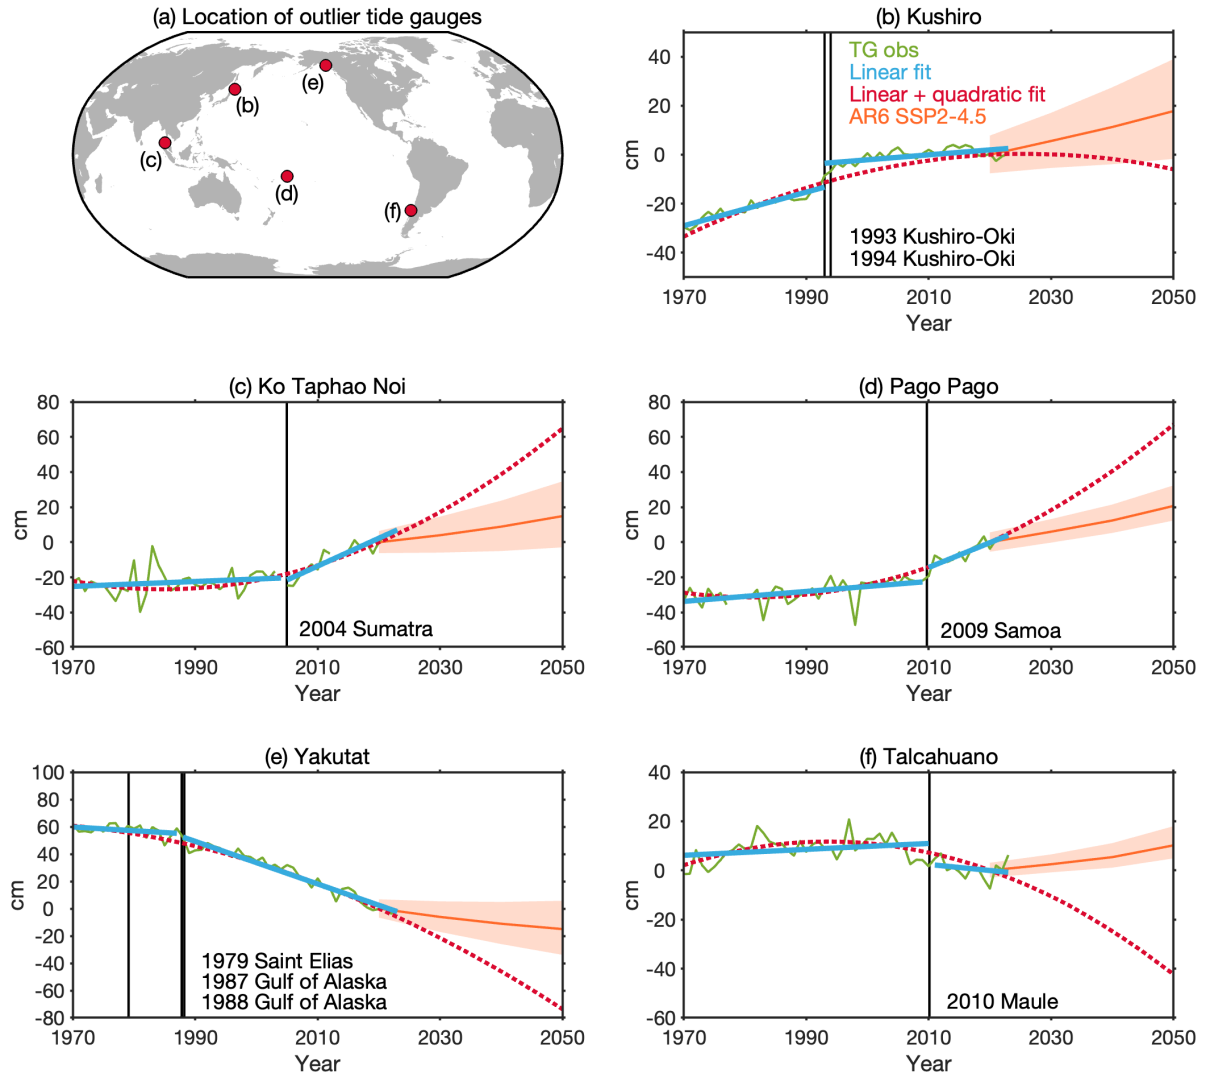

**Supplementary Figure 2. Removed tide gauge stations.** **a** Locations of removed tide gauges. Sea level change (cm) at removed tide gauges with the changed sea-level rise rate after the respective major earthquakes, including **b** Kushiro with, **c** Ko Taphao Noi, **d** Pago Pago with, **e** Yakutat. **f** Talcahuano. The black vertical lines indicate years of major earthquakes in the vicinity of the station. The green curves are annual mean tide gauge observations. The blue lines denote the linear fits before and after major earthquakes. The red lines represent the linear-plus-quadratic fit during the

whole research period 1970-2023 and extrapolated to 2050. The orange lines are from AR6 projection under SSP2-4.5, and the shadings are the associated 90% uncertainty range.

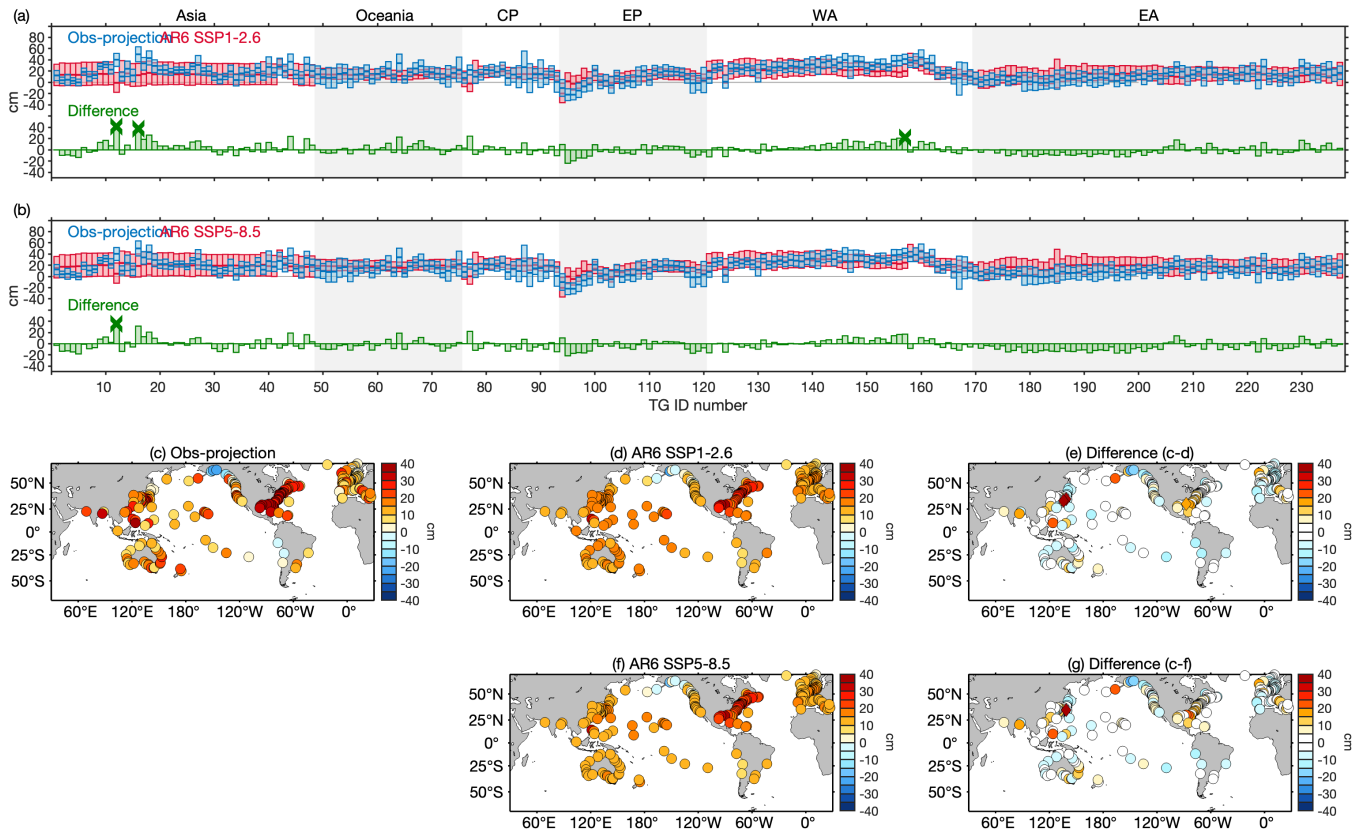

**Supplementary Figure 3. Comparison of sea-level rise at individual tide gauges from**

**observation-based projection and AR6 projections under SSP1-2.6 and SSP5-8.5.**

**a** The sea-level rise in 2050 relative to 2020 (cm) from observation-based projections (blue), AR6 projections under SSP1-2.6 scenario (red), and their difference (observation-based projection minus AR6 projection; green). The error bars denote the 90% uncertainty range. The cross symbols denote the sea-level rise from observation-based projection are significantly different from the projection. **b** The same as (a), but comparing with the AR6 projection under SSP5-8.5. Spatial distribution from (c) observation-based projection, (d) AR6 projection under SSP1-2.6, and (e) their difference (observation-based projection minus AR6 projection). Spatial distribution from (f) AR6 projection under SSP5-8.5, and (g) the difference (observation-based projection minus AR6 projection). In (e) and (g), the diamond

symbols denote the sea level rise from observation-based projection are significantly different from the projection.

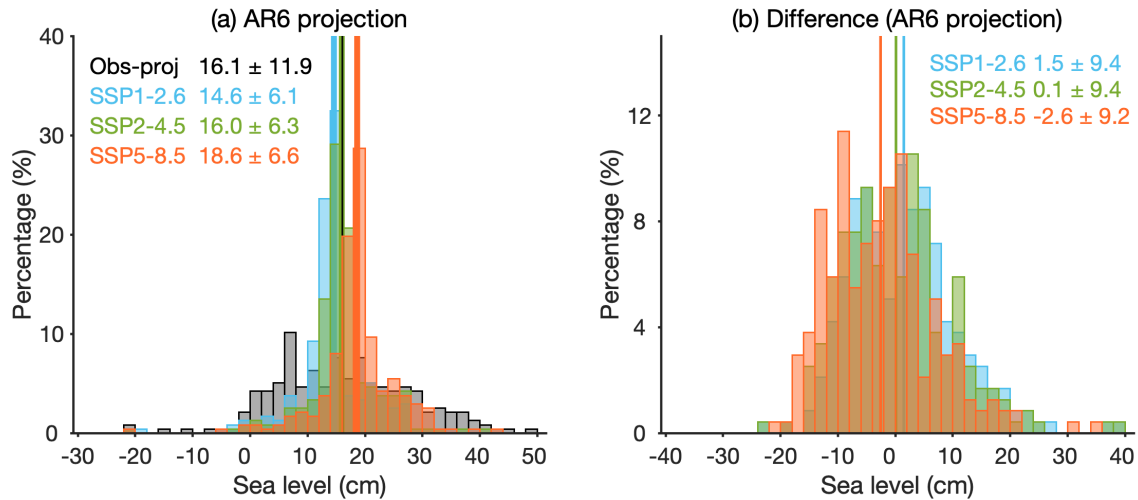

**Supplementary Figure 4. The histogram of sea-level rise in 2050 relative to 2020 from observation-based projection and AR6 process-based projections. a** Sea-level rise from observation-based projections (gray), and AR6 projections under a low emissions scenario SSP1-2.6 (blue), intermediate emissions scenario SSP2-4.5 (green), and high emissions scenario SSP5-8.5 (orange). The bin width is 1.5 cm, and the vertical lines present the mean sea-level rise at all tide gauge stations. **b** The corresponding differences between the observation-based projections and AR6 projections under three emission scenarios.

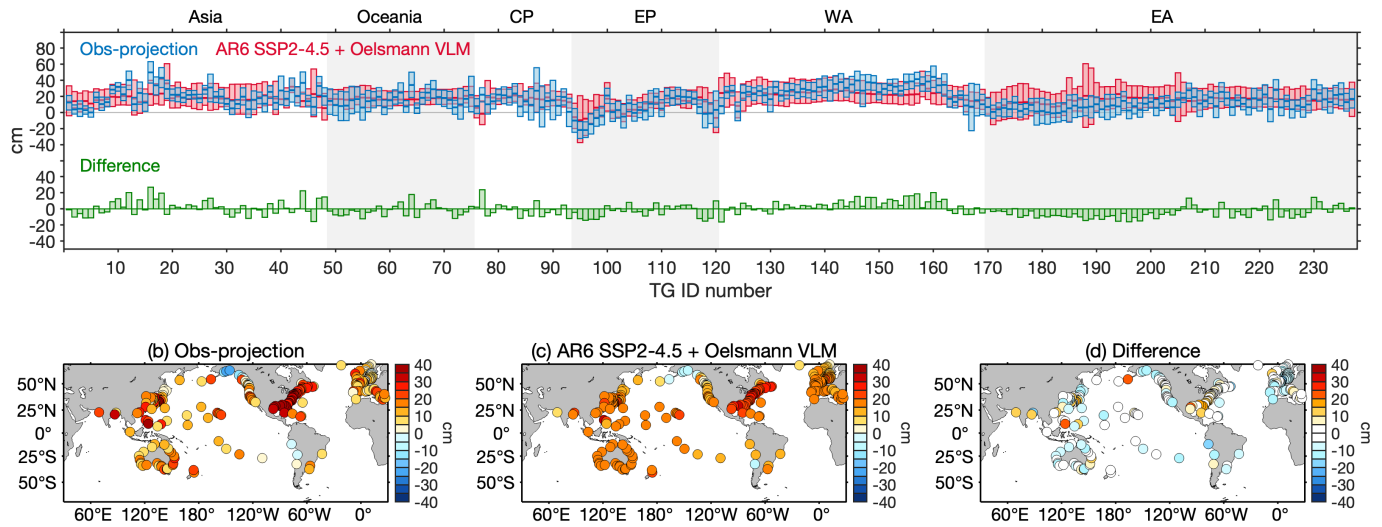

**Supplementary Figure 5. Comparison of sea-level rise from observation-based and**

**VLM-adjusted AR6 projections under SSP2-4.5 at individual tide gauges. a** The sea-level rise in 2050 relative to 2020 (cm) from observation-based projection (blue), AR6-adjust projection by using the VLM from Oelsmann et al. (2024) under SSP2-4.5 scenario (red), and their difference (observation-based projection minus AR6 projection; green). The error bars denote the 90% uncertainty range. Spatial distribution from **(b)** observation-based projection, **(c)** AR6-adjust projection under SSP2-4.5, and **(d)** their difference (observation-based projection minus AR6-adjust projection).

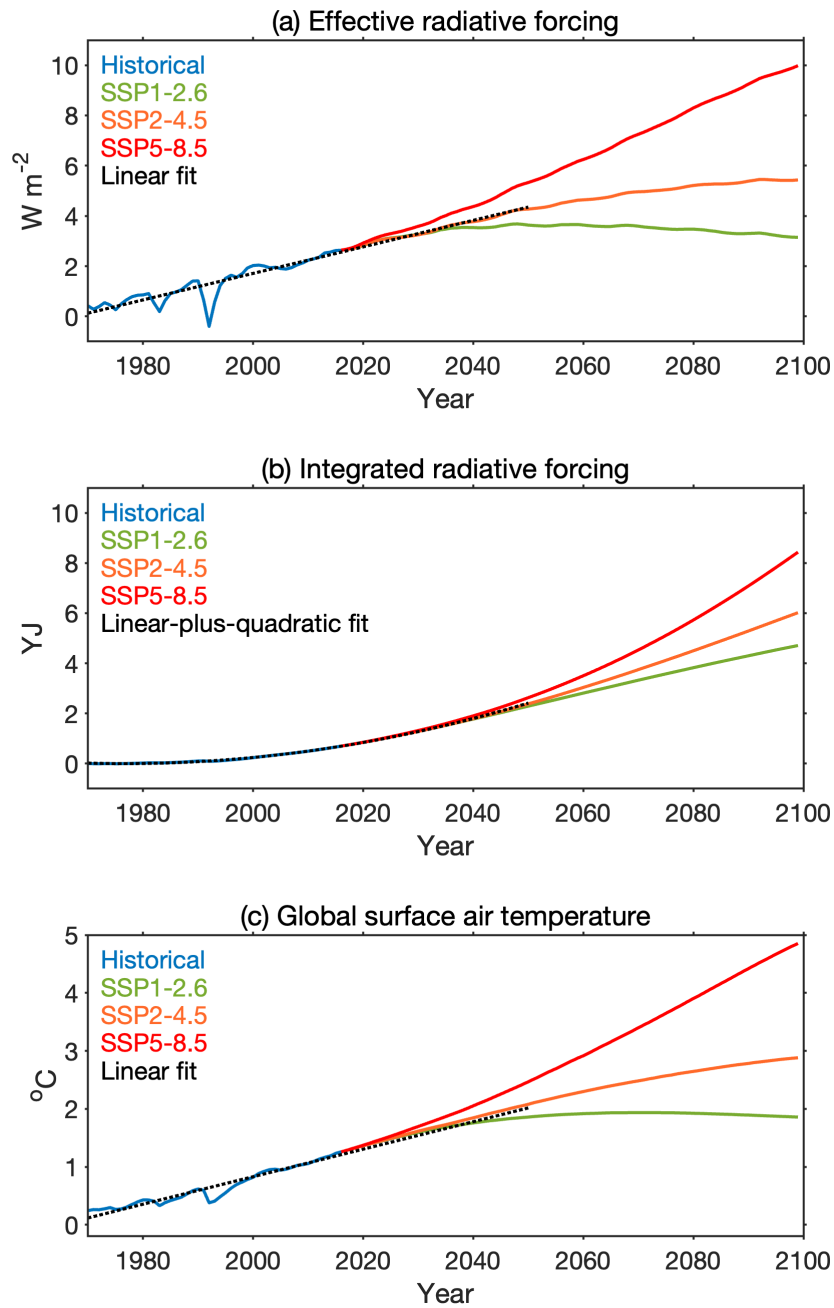

**Supplementary Figure 6. a** Global effective radiative forcing ( $W m^{-2}$ ) from CMIP6 used in IPCC AR6 report. The time series are provided for all forcing together (natural plus anthropogenic changes), encompassing the historical period (blue), SSP1-2.6 (green), SSP2-4.5 (orange), and SSP5-8.5 (red). Black dotted line indicates the linear fit

estimated from 1970 to 2023 and extrapolated to 2050. **b** Time-integrated effective radiative forcing ( $\text{YJ} = 10^{24}$  Joules). Black dotted line indicates the linear-plus-quadratic fit estimated from 1970-2023 and extrapolated to 2050. **c** Global surface air temperature ( $^{\circ}\text{C}$ ) from CMIP6 used IPCC AR6 report. Black dotted line indicates the linear fit estimated from 1970 to 2023 and extrapolated to 2050.

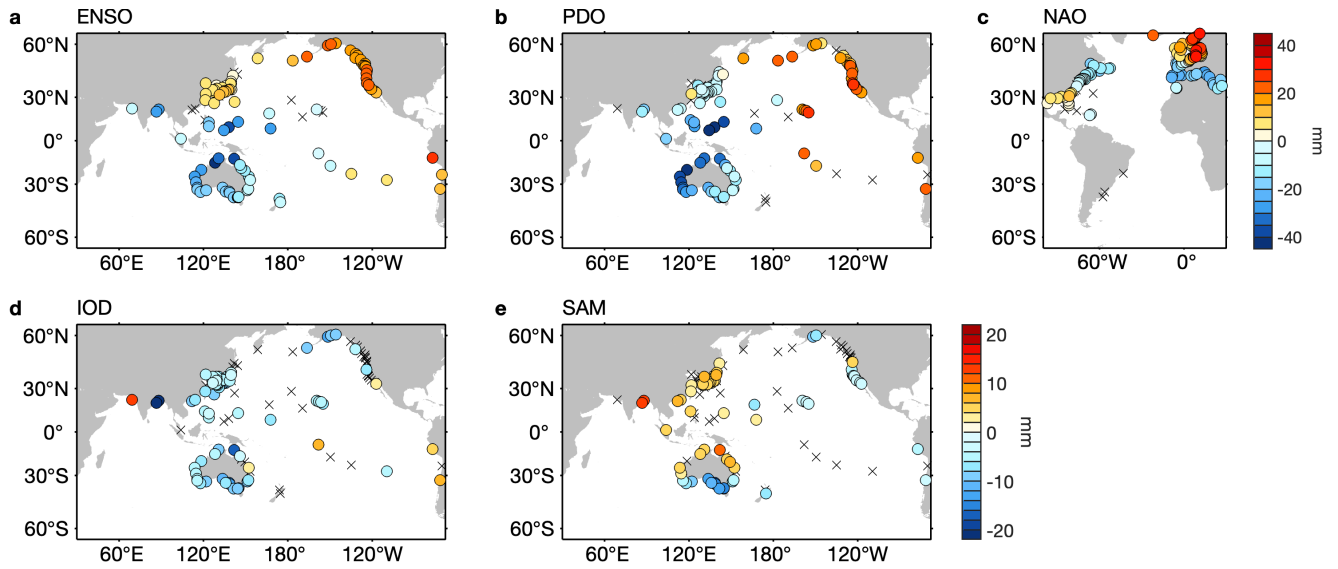

**Supplementary Figure 7. Regression coefficient maps from the multiple variable linear regression (MVL) analysis.** Colored circles indicate significant regression coefficients of tide-gauge records (1970–2023) related to the (a) high-passed ENSO, (b) low-passed PDO, (c) NAO, (d) IOD, and (e) SAM index. Regression coefficients of tide-gauge records, which are not significant at 90% confidence level are denoted as cross symbols. Note that the colorbar differs between panel a-c and panel d-e.

**Table S1.** Tide gauge stations list. The tide gauge stations are divided into six regions according to the geographical locations, including the Asia nearby coastline (TG ID 1-48), the Oceania coastline (TG ID 49-75), the central Pacific Ocean (CP, TG ID 76-93), the east coast of the Pacific Ocean (EP, TG ID 94-120), the west coast of the Atlantic Ocean (WA, TG ID 121-169), and the east coast of the Atlantic Ocean (EA, TG ID 170-237).

|      | TG ID | Longitude | Latitude | Name                                                                        | PSMSL/<br>ANCHORS |
|------|-------|-----------|----------|-----------------------------------------------------------------------------|-------------------|
| Asia | 1     | 158.65    | 52.98    | PETROPAVLOVSK-KAMCHATSKY                                                    | P                 |
|      | 2     | 141.69    | 45.41    | WAKKANAI                                                                    | P                 |
|      | 3     | 144.29    | 44.02    | ABASHIRI                                                                    | P                 |
|      | 4     | 140.86    | 43.21    | OSHOHO II                                                                   | P                 |
|      | 5     | 139.71    | 39.94    | OGA                                                                         | P                 |
|      | 6     | 139.55    | 38.56    | NEZUGASEKI                                                                  | P                 |
|      | 7     | 139.26    | 38.47    | AWA SIMA                                                                    | P                 |
|      | 8     | 136.90    | 37.41    | WAJIMA;<br>TOYAMA                                                           | P                 |
|      | 9     | 133.33    | 36.2     | SAIGO; SAKAI                                                                | P                 |
|      | 10    | 134.32    | 35.59    | TAJIRI                                                                      | P                 |
|      | 11    | 136.15    | 36.25    | MIKUNI                                                                      | P                 |
|      | 12    | 138.52    | 35.01    | MINAMI IZU; OKADA;<br>ITO II; TAGO;<br>UCHIURA; SHIMIZU-<br>MINATO          | P                 |
|      | 13    | 139.82    | 34.92    | KATSUURA;<br>ABURATSUBO;<br>MERA; YOKOSUKA                                  | P                 |
|      | 14    | 137.61    | 34.68    | MAISAKA;<br>OMAEZAKI II; YAIZU                                              | P                 |
|      | 15    | 135.15    | 34.22    | SUMOTO;<br>SHIRAHAMA;<br>KAINAN;<br>KOMATSUSHIMA;<br>WAKAYAMA; TAN-<br>NOWA | P                 |
|      | 16    | 135.90    | 33.56    | URAGAMI; OWASE                                                              | P                 |
|      | 17    | 135.77    | 33.48    | KUSHIMOTO                                                                   | P                 |
|      | 18    | 134.16    | 33.27    | MUROTOMISAKI;<br>KOCHI III                                                  | P                 |

|      |         |        |        |                                                                |         |   |
|------|---------|--------|--------|----------------------------------------------------------------|---------|---|
| Asia | 19      | 132.96 | 32.78  | UWAJIMA II; KURE I;<br>TOSA SHIMIZU                            | P       |   |
|      | 20      | 131.67 | 32.43  | HOSOJIMA                                                       | P       |   |
|      | 21      | 131.41 | 31.58  | ABURATSU                                                       | P       |   |
|      | 22      | 130.99 | 30.74  | NISINOOMOTE;<br>ODOMARI                                        | P       |   |
|      | 23      | 130.19 | 32.02  | AKUNE                                                          | P       |   |
|      | 24      | 129.87 | 32.74  | NAGASAKI; OURA;<br>SASEBO II; KARIYA;<br>KUCHINOTSU;<br>MISUMI | P       |   |
|      | 25      | 128.85 | 32.7   | FUKUE                                                          | P       |   |
|      | 26      | 130.41 | 33.62  | HAKATA                                                         | P       |   |
|      | 27      | 130.91 | 37.49  | ULLEUNG                                                        | P       |   |
|      | 28      | 129.12 | 37.55  | MUKHO; SOKCHO                                                  | P       |   |
|      | 29      | 129.39 | 35.5   | POHANG; ULSAN                                                  | P       |   |
|      | 30      | 129.04 | 35.1   | GADEOKDO; BUSAN                                                | P       |   |
|      | 31      | 127.77 | 34.75  | YEOSU; TONGYEONG                                               | P       |   |
|      | 32      | 126.54 | 33.53  | JEJU; GEOMUNDO;<br>WANDO                                       | P       |   |
|      | 33      | 126.38 | 34.78  | MOKPO                                                          | P       |   |
|      | 34      | 125.44 | 34.68  | HEUKSANDO                                                      | P       |   |
|      | 35      | 126.59 | 37.45  | INCHEON                                                        | P       |   |
|      | 36      | 121.68 | 38.87  | DALIAN                                                         | P       |   |
|      | 37      | 121.62 | 32.13  | LUSI                                                           | P       |   |
|      | 38      | 121.28 | 28.08  | KANMEN                                                         | P       |   |
|      | 39      | 127.67 | 26.21  | NAHA; OKINAWA                                                  | P       |   |
|      | 40      | 114.18 | 22.44  | TAI PO KAU, TOLO<br>HARBOUR; TSIM BEI<br>TSUI                  | P       |   |
|      | 41      | 111.82 | 21.58  | ZHAPO                                                          | P       |   |
|      | 42      | 120.97 | 14.58  | MANILA, S. HARBOR                                              | P       |   |
|      | 43      | 123.75 | 13.15  | LEGASPI, ALBAY                                                 | P       |   |
|      | 44      | 123.92 | 10.30  | CEBU                                                           | P       |   |
|      | 45      | 103.83 | 1.47   | SULTAN SHOAL;<br>RAFFLES LIGHT<br>HOUSE; SEMBAWANG             | P       |   |
|      | 46      | 88.10  | 22.03  | HALDIA; DIAMOND<br>HARBOUR                                     | P       |   |
|      | 47      | 86.70  | 20.27  | PARADIP                                                        | P       |   |
|      | 48      | 69.08  | 22.47  | OKHA                                                           | P       |   |
|      | Oceania | 49     | 130.85 | -12.47                                                         | Darwin  | A |
|      |         | 50     | 128.10 | -15.45                                                         | Wyndham | A |
| 51   |         | 118.57 | -20.32 | PORT HEDLAND                                                   | P       |   |
| 52   |         | 113.65 | -24.90 | Carnarvon                                                      | A       |   |

|         |    |        |        |                                 |                      |   |
|---------|----|--------|--------|---------------------------------|----------------------|---|
| Oceania | 53 | 114.60 | -28.78 | Geraldton                       | A                    |   |
|         | 54 | 115.74 | -32.06 | FREMANTLE                       | P                    |   |
|         | 55 | 115.66 | -33.32 | BUNBURY                         | P                    |   |
|         | 56 | 117.89 | -35.03 | Albany                          | A                    |   |
|         | 57 | 121.90 | -33.87 | Esperance                       | A                    |   |
|         | 58 | 133.64 | -32.15 | Thevenard                       | A                    |   |
|         | 59 | 135.87 | -34.72 | PORT LINCOLN                    | P                    |   |
|         | 60 | 138.48 | -34.78 | PORT ADELAIDE<br>(OUTER HARBOR) | P                    |   |
|         | 61 | 138.64 | -35.56 | Victor Harbor                   | A                    |   |
|         | 62 | 141.62 | -38.35 | Portland                        | A                    |   |
|         | 63 | 144.36 | -38.15 | Geelong                         | A                    |   |
|         | 64 | 144.61 | -38.29 | Point Lonsdale                  | A                    |   |
|         | 65 | 144.92 | -37.87 | Melbourne                       | A                    |   |
|         | 66 | 151.23 | -33.85 | SYDNEY, FORT<br>DENISON 2       | P                    |   |
|         | 67 | 151.79 | -32.92 | Newcastle                       | A                    |   |
|         | 68 | 153.17 | -27.37 | BRISBANE (WEST<br>INNER BAR)    | P                    |   |
|         | 69 | 152.38 | -24.77 | Bundaberg                       | A                    |   |
|         | 70 | 149.23 | -21.12 | Mackay                          | A                    |   |
|         | 71 | 146.83 | -19.25 | TOWNSVILLE I                    | P                    |   |
|         | 72 | 145.78 | -16.93 | Cairns                          | A                    |   |
|         | 73 | 141.86 | -12.67 | Weipa                           | A                    |   |
|         | 74 | 174.78 | -41.28 | WELLINGTON<br>HARBOUR           | P                    |   |
|         | 75 | 174.03 | -39.06 | PORT TARANAKI                   | P                    |   |
|         | CP | 76     | 183.37 | 51.86                           | ADAK SWEEPER<br>COVE | P |
|         |    | 77     | 193.46 | 53.88                           | UNALASKA             | P |
| 78      |    | 142.18 | 27.08  | CHICHIJIMA                      | P                    |   |
| 79      |    | 182.64 | 28.21  | MIDWAY ISLAND                   | P                    |   |
| 80      |    | 200.65 | 21.95  | NAWILIWILI BAY,<br>KAUAI ISLAND | P                    |   |
| 81      |    | 202.13 | 21.31  | HONOLULU;<br>MOKUOLOE ISLAND    | P                    |   |
| 82      |    | 203.52 | 20.90  | KAHULUI HARBOR,<br>MAUI ISLAND  | P                    |   |
| 83      |    | 204.95 | 19.73  | HILO, HAWAII<br>ISLAND          | P                    |   |
| 84      |    | 166.62 | 19.29  | WAKE ISLAND                     | P                    |   |
| 85      |    | 190.47 | 16.74  | JOHNSTON ISLAND                 | P                    |   |
| 86      |    | 144.65 | 13.44  | APRA HARBOR                     | P                    |   |
| 87      |    | 138.13 | 9.52   | YAP B                           | P                    |   |
| 88      |    | 134.47 | 7.33   | MALAKAL-B                       | P                    |   |

|     |        |        |                                                                  |                                                                                  |   |
|-----|--------|--------|------------------------------------------------------------------|----------------------------------------------------------------------------------|---|
| CP  | 89     | 167.74 | 8.73                                                             | KWAJALEIN                                                                        | P |
|     | 90     | 201.93 | -9.02                                                            | PENRHYN                                                                          | P |
|     | 91     | 210.43 | -17.53                                                           | PAPEETE-B, FARE<br>UTE POINT, SOC.IS.                                            | P |
|     | 92     | 225.03 | -23.12                                                           | RIKITEA                                                                          | P |
|     | 93     | 250.53 | -27.15                                                           | EASTER ISLAND-E                                                                  | P |
| EP  | 94     | 208.28 | 59.44                                                            | SELDOVIA                                                                         | P |
|     | 95     | 210.57 | 60.12                                                            | SEWARD                                                                           | P |
|     | 96     | 214.25 | 60.56                                                            | VALDEZ; CORDOVA                                                                  | P |
|     | 97     | 224.66 | 57.05                                                            | SITKA                                                                            | P |
|     | 98     | 228.38 | 55.33                                                            | KETCHIKAN                                                                        | P |
|     | 99     | 229.67 | 54.32                                                            | PRINCE RUPERT                                                                    | P |
|     | 100    | 227.93 | 53.25                                                            | QUEEN CHARLOTTE<br>CITY                                                          | P |
|     | 101    | 231.87 | 52.17                                                            | BELLA BELLA                                                                      | P |
|     | 102    | 232.52 | 50.72                                                            | PORT HARDY                                                                       | P |
|     | 103    | 234.77 | 50.02                                                            | CAMPBELL RIVER                                                                   | P |
|     | 104    | 234.08 | 49.15                                                            | TOFINO                                                                           | P |
|     | 105    | 234.87 | 48.85                                                            | BAMFIELD                                                                         | P |
|     | 106    | 235.39 | 48.37                                                            | NEAH BAY                                                                         | P |
|     | 107    | 236.03 | 46.71                                                            | TOKE POINT, WILLIPA<br>BAY, WA                                                   | P |
|     | 108    | 236.23 | 46.21                                                            | ASTORIA (TONGUE<br>POINT)                                                        | P |
|     | 109    | 235.96 | 44.63                                                            | SOUTH BEACH                                                                      | P |
|     | 110    | 235.82 | 41.75                                                            | CRESCENT CITY                                                                    | P |
|     | 111    | 236.29 | 38.91                                                            | ARENA COVE,<br>CALIFORNIA                                                        | P |
|     | 112    | 237.02 | 37.99                                                            | POINT REYES                                                                      | P |
|     | 113    | 237.54 | 37.81                                                            | SAN FRANCISCO;<br>PORT CHICAGO,<br>CALIFORNIA;<br>ALAMEDA (NAVAL<br>AIR STATION) | P |
| 114 | 238.11 | 36.60  | MONTEREY                                                         | P                                                                                |   |
| 115 | 239.24 | 35.18  | PORT SAN LUIS                                                    | P                                                                                |   |
| 116 | 241.73 | 33.72  | LOS ANGELES;<br>SANTA MONICA<br>(MUNICIPAL PIER)                 | P                                                                                |   |
| 117 | 242.74 | 32.87  | SAN DIEGO<br>(QUARANTINE<br>STATION); LA JOLLA<br>(SCRIPPS PIER) | P                                                                                |   |
| 118 | 282.85 | -12.05 | CALLAO 2                                                         | P                                                                                |   |
| 119 | 289.60 | -23.65 | ANTOFAGASTA 2                                                    | P                                                                                |   |

|     |        |        |                                                             |                                                                                 |   |
|-----|--------|--------|-------------------------------------------------------------|---------------------------------------------------------------------------------|---|
| EP  | 120    | 288.37 | -33.03                                                      | VALPARAISO                                                                      | P |
| WA  | 121    | 307.28 | 47.57                                                       | ST. JOHNS, NFLD.                                                                | P |
|     | 122    | 306.02 | 47.30                                                       | ARGENTIA                                                                        | P |
|     | 123    | 300.87 | 47.57                                                       | PORT AUX BASQUES                                                                | P |
|     | 124    | 293.60 | 50.2                                                        | SEPT-ILES                                                                       | P |
|     | 125    | 295.62 | 49.00                                                       | RIVIERE-AU-RENARD                                                               | P |
|     | 126    | 295.12 | 47.08                                                       | LOWER ESCUMINAC                                                                 | P |
|     | 127    | 296.88 | 46.23                                                       | CHARLOTTETOWN                                                                   | P |
|     | 128    | 299.75 | 46.22                                                       | NORTH SYDNEY                                                                    | P |
|     | 129    | 293.87 | 43.83                                                       | YARMOUTH                                                                        | P |
|     | 130    | 293.93 | 45.27                                                       | SAINT JOHN, N.B.                                                                | P |
|     | 131    | 293.02 | 44.90                                                       | EASTPORT                                                                        | P |
|     | 132    | 291.80 | 44.39                                                       | BAR HARBOR,<br>FRENCHMAN BAY,<br>ME                                             | P |
|     | 133    | 289.75 | 43.66                                                       | PORTLAND (MAINE)                                                                | P |
|     | 134    | 289.90 | 41.29                                                       | NANTUCKET ISLAND                                                                | P |
|     | 135    | 288.67 | 41.51                                                       | BOSTON; NEWPORT;<br>WOODS HOLE<br>(OCEAN. INST.);<br>PROVIDENCE (STATE<br>PIER) | P |
|     | 136    | 287.91 | 41.36                                                       | NEW LONDON;<br>MONTAUK                                                          | P |
|     | 137    | 286.82 | 41.17                                                       | BRIDGEPORT                                                                      | P |
|     | 138    | 285.99 | 40.70                                                       | NEW YORK (THE<br>BATTERY)                                                       | P |
|     | 139    | 285.99 | 40.47                                                       | SANDY HOOK                                                                      | P |
| 140 | 284.86 | 39.93  | PHILADELPHIA (PIER<br>9N)                                   | P                                                                               |   |
| 141 | 285.58 | 39.35  | ATLANTIC CITY                                               | P                                                                               |   |
| 142 | 284.88 | 38.78  | CAPE MAY; LEWES<br>(BREAKWATER<br>HARBOR)                   | P                                                                               |   |
| 143 | 283.53 | 37.99  | LEWISSETTA,<br>VIRGINIA;<br>SOLOMONS ISLAND<br>(BIOL. LAB.) | P                                                                               |   |
| 144 | 283.67 | 36.95  | SEWELLS POINT,<br>HAMPTON ROADS;<br>KIPTOPEKE BEACH         | P                                                                               |   |
| 145 | 283.33 | 34.72  | BEAUFORT, NORTH<br>CAROLINA                                 | P                                                                               |   |
| 146 | 282.05 | 34.23  | WILMINGTON                                                  | P                                                                               |   |
| 147 | 281.08 | 33.66  | SPRINGMAID PIER                                             | P                                                                               |   |

|     |        |        |                             |                                          |   |
|-----|--------|--------|-----------------------------|------------------------------------------|---|
| WA  | 148    | 280.08 | 32.78                       | CHARLESTON I                             | P |
|     | 149    | 279.10 | 32.03                       | FORT PULASKI                             | P |
|     | 150    | 278.53 | 30.67                       | FERNANDINA BEACH                         | P |
|     | 151    | 278.19 | 24.56                       | KEY WEST                                 | P |
|     | 152    | 278.19 | 26.13                       | NAPLES                                   | P |
|     | 153    | 278.13 | 26.65                       | FORT MYERS                               | P |
|     | 154    | 277.37 | 27.76                       | ST. PETERSBURG                           | P |
|     | 155    | 276.97 | 29.14                       | CEDAR KEY II                             | P |
|     | 156    | 275.02 | 29.73                       | APALACHICOLA                             | P |
|     | 157    | 272.79 | 30.4                        | PENSACOLA                                | P |
|     | 158    | 270.04 | 29.26                       | GRAND ISLE                               | P |
|     | 159    | 265.21 | 29.31                       | GALVESTON II, PIER<br>21, TX             | P |
|     | 160    | 262.95 | 28.02                       | ROCKPORT                                 | P |
|     | 161    | 262.78 | 26.06                       | PORT ISABEL                              | P |
|     | 162    | 275.10 | 21.90                       | CABO DE SAN<br>ANTONIO                   | P |
|     | 163    | 283.88 | 21.11                       | GIBARA                                   | P |
|     | 164    | 293.89 | 18.46                       | SAN JUAN                                 | P |
|     | 165    | 292.96 | 17.97                       | MAGUEYES ISLAND                          | P |
|     | 166    | 295.30 | 32.37                       | ST. GEORGES / ESSO<br>PIER (BERMUDA)     | P |
| 167 | 316.83 | -22.9  | ILHA FISCAL                 | P                                        |   |
| 168 | 303.75 | -34.9  | MONTEVIDEO<br>(PUNTA LOBOS) | P                                        |   |
| 169 | 302.48 | -38.03 | MAR DEL PLATA<br>(CLUB)     | P                                        |   |
| EA  | 170    | 338.06 | 64.15                       | REYKJAVIK                                | P |
|     | 171    | 11.23  | 64.86                       | RORVIK                                   | P |
|     | 172    | 9.10   | 63.43                       | HEIMSJOEN                                | P |
|     | 173    | 7.73   | 63.11                       | KRISTIANSUND                             | P |
|     | 174    | 6.15   | 62.47                       | ALESUND                                  | P |
|     | 175    | 5.11   | 61.93                       | MALOY                                    | P |
|     | 176    | 5.32   | 60.40                       | BERGEN                                   | P |
|     | 177    | 5.73   | 58.97                       | STAVANGER                                | P |
|     | 178    | 7.55   | 58.01                       | TREGDE                                   | P |
|     | 179    | 8.60   | 57.12                       | HANSTHOLM                                | P |
|     | 180    | 9.96   | 57.60                       | HIRTSHALS                                | P |
|     | 181    | 10.55  | 57.44                       | FREDERIKSHAVN                            | P |
|     | 182    | 11.22  | 58.35                       | SMOGEN                                   | P |
|     | 183    | 11.83  | 58.09                       | GOTEBORG –<br>TORSHAMNEN;<br>STENUNGSUND | P |
|     | 184    | 12.11  | 57.25                       | RINGHALS                                 | P |
|     | 185    | 12.46  | 56.09                       | HORNBAEK                                 | P |

|     |        |        |            |                                                |   |
|-----|--------|--------|------------|------------------------------------------------|---|
| EA  | 186    | 12.89  | 55.52      | VIKEN; KLAGSHAMN;<br>KOBENHAVN                 | P |
|     | 187    | 10.83  | 55.29      | KORSOR; SLIPSHAVN                              | P |
|     | 188    | 12.10  | 54.17      | WARNEMUNDE 2                                   | P |
|     | 189    | 11.93  | 54.57      | GEDSER                                         | P |
|     | 190    | 10.87  | 53.96      | TRAVEMUNDE;<br>WISMAR 2                        | P |
|     | 191    | 10.16  | 54.37      | KIEL-HOLTENAU                                  | P |
|     | 192    | 8.38   | 54.62      | AMRUM<br>(WITTDUEN);<br>ESBJERG                | P |
|     | 193    | 8.72   | 53.87      | CUXHAVEN 2                                     | P |
|     | 194    | 6.75   | 53.56      | BORKUM<br>(FISCHERBALJE)                       | P |
|     | 195    | 6.93   | 53.33      | DELFIJL                                        | P |
|     | 196    | 4.75   | 52.96      | DEN HELDER; WEST-<br>TERSCHELLING;<br>ARLINGEN | P |
|     | 197    | 4.55   | 52.46      | IJMUIDEN                                       | P |
|     | 198    | 4.12   | 51.98      | HOEK VAN<br>HOLLAND;<br>MAASSLUIS              | P |
|     | 199    | 3.60   | 51.44      | VLISSINGEN                                     | P |
|     | 200    | 2.92   | 51.23      | OOSTENDE;<br>ZEEBRUGGE;<br>NIEUWPOORT          | P |
|     | 201    | 2.37   | 51.05      | CALAIS;<br>DUNKERQUE                           | P |
|     | 202    | 1.32   | 51.11      | DOVER; SHEERNESS                               | P |
|     | 203    | 1.75   | 52.47      | LOWESTOFT                                      | P |
|     | 204    | 357.92 | 57.14      | ABERDEEN I                                     | P |
|     | 205    | 356.91 | 58.44      | WICK                                           | P |
|     | 206    | 358.86 | 60.15      | LERWICK                                        | P |
|     | 207    | 353.61 | 58.21      | STORNOWAY                                      | P |
|     | 208    | 355.09 | 55.75      | MILLPORT                                       | P |
|     | 209    | 357.08 | 54.03      | HEYSHAM                                        | P |
|     | 210    | 355.38 | 53.31      | HOLYHEAD                                       | P |
|     | 211    | 354.46 | 50.10      | NEWLYN                                         | P |
|     | 212    | 355.81 | 50.37      | DEVONPORT                                      | P |
|     | 213    | 358.89 | 50.80      | PORTSMOUTH                                     | P |
| 214 | 358.36 | 49.65  | CHERBOURG  | P                                              |   |
| 215 | 356.03 | 48.72  | ROSCOFF    | P                                              |   |
| 216 | 355.22 | 48.36  | LE CONQUET | P                                              |   |
| 217 | 355.51 | 48.38  | BREST      | P                                              |   |
| 218 | 356.55 | 47.64  | PORT TUDY  | P                                              |   |

|     |       |        |                 |                                              |   |
|-----|-------|--------|-----------------|----------------------------------------------|---|
| EA  | 219   | 358.49 | 43.53           | BOUCAU                                       | P |
|     | 220   | 356.21 | 43.46           | SANTANDER I                                  | P |
|     | 221   | 351.60 | 43.37           | LA CORUÑA I; LA<br>CORUÑA II                 | P |
|     | 222   | 351.27 | 42.24           | VIGO                                         | P |
|     | 223   | 354.40 | 36.01           | TARIFA                                       | P |
|     | 224   | 354.68 | 35.89           | CEUTA                                        | P |
|     | 225   | 5.35   | 43.28           | MARSEILLE                                    | P |
|     | 226   | 7.29   | 43.70           | NICE                                         | P |
|     | 227   | 8.90   | 44.40           | GENOVA                                       | P |
|     | 228   | 13.63  | 45.08           | ROVINJ                                       | P |
|     | 229   | 14.54  | 45.31           | BAKAR                                        | P |
|     | 230   | 16.44  | 43.51           | SPLIT - GRADSKA<br>LUKA; SPLIT RT<br>MARJANA | P |
|     | 231   | 18.06  | 42.66           | DUBROVNIK                                    | P |
|     | 232   | 20.71  | 38.83           | LEVKAS; PREVEZA                              | P |
|     | 233   | 21.32  | 37.64           | KATAKOLON                                    | P |
|     | 234   | 24.08  | 35.49           | SODHAS                                       | P |
|     | 235   | 24.95  | 37.44           | SIROS                                        | P |
| 236 | 26.85 | 37.13  | LEROS           | P                                            |   |
| 237 | 25.88 | 40.84  | ALEXANDROUPOLIS | P                                            |   |
